# Supplementary material for: The V86M mutation in HIV-1 capsid confers resistance to TRIM5α by abrogation of cyclophilin A-dependent restriction and enhancement of viral nuclear import
Source: PubMed Central journal article supplement (PMC3598646; doi:10.1186/1742-4690-10-25), 2013-02-28

**The V86M mutation in HIV-1 Capsid Confers Resistance to TRIM5 $\alpha$  by Abrogation of Cyclophilin A-Dependent Restriction and Enhancement of Viral Nuclear Import.**

*Supplementary data*

**Figure S1. CA-V86M HIV-1 is inhibited by CsA in human lymphocytes and macrophages.** (A) Activated human CD4<sup>+</sup> lymphocytes were challenged with WT or V86M HIV-1<sub>NL-GFP</sub> at a multiplicity of infection of ~0.1 in the absence or presence of 2  $\mu$ M CsA. WT and V86M viral preparations were adjusted by reverse transcriptase assay. The percentage of infected (GFP-positive) cells was determined two days later by flow cytometry. Shown are average values from three independent infections with standard deviations. (B) THP-1 cells differentiated and polarized into either macrophages (M0), pro-inflammatory macrophages (M1) or anti-inflammatory macrophages (M2) were challenged with WT or V86M HIV-1<sub>NL-GFP</sub> exactly like above but at an M.O.I of ~0.02.

**Figure S2. Western blotting analysis of CypA knockdown.** TE671 cells (top) and Sup-T1 cells (bottom) expressing the indicated TRIM5 $\alpha_{hu}$  mutants and controls were stably transduced with retroviral vectors expressing shRNAs targeting either CypA or the non-relevant control Luciferase. Untransduced cells were eliminated; then, whole cell lysates were prepared from a similar numbers of cells and processed for western blotting using antibodies against CypA or X-actin as a loading control.

**Figure S3. Restriction of WT and CA-V86M HIV-1 by a panel of TRIM5 $\alpha_{hu}$  mutants.** (A) TE671 cells transduced with the indicated TRIM5 $\alpha$  cDNAs were challenged with multiple doses of WT or CA-V86M HIV-1<sub>NL-GFP</sub> as described in Figure

1. Cells were analyzed by FACS 2 days later. Control permissive cells transduced with the “empty” vector and infected with WT HIV-1<sub>NL-GFP</sub> are included. **(B)** TE671 cells expressing the indicated TRIM5 $\alpha_{hu}$  mutants and controls were challenged with WT or V86M HIV-1<sub>NL-GFP</sub> in the presence of increasing concentrations of CsA. Virus doses were adjusted for each virus-cell combination so that approximately 1% of the cells were infected in the absence of CsA. The percentage of GFP-positive cells was determined by FACS 2 days later and results are shown as –fold increases relative to the no-drug controls.

**S1****A**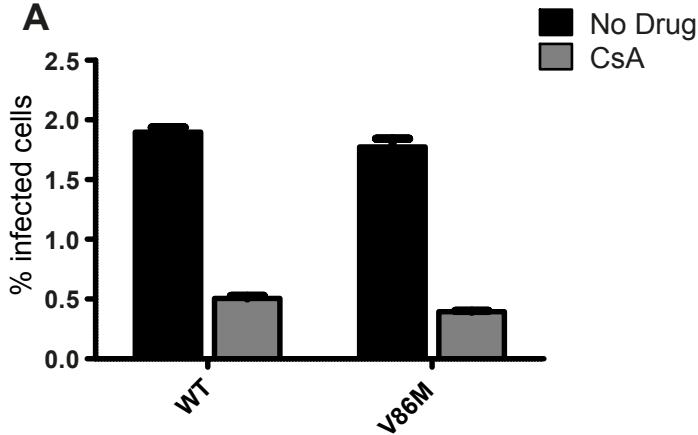**B**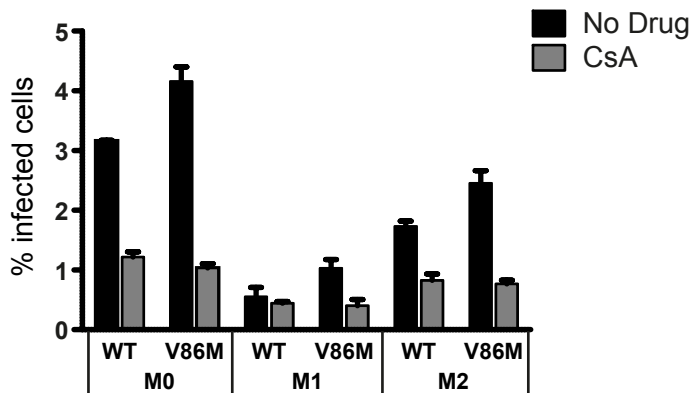

**S2****A****TE671**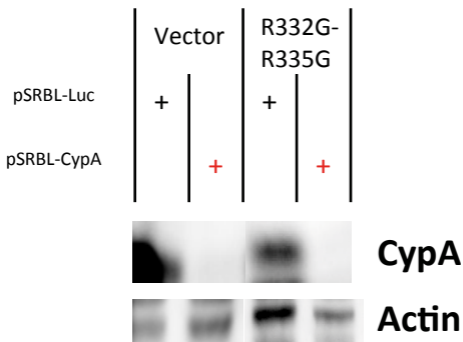**B****SUP-T1**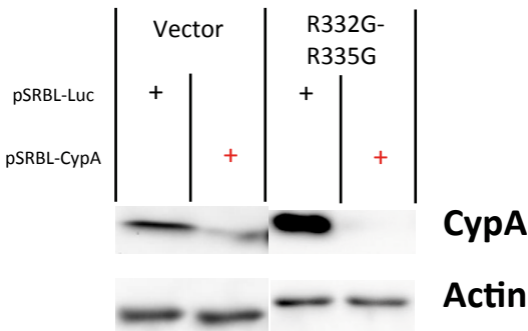

**S3****A**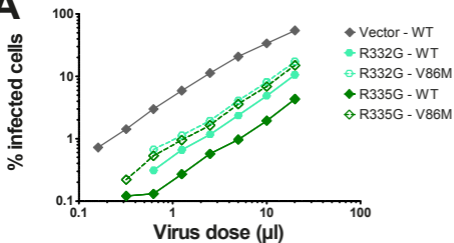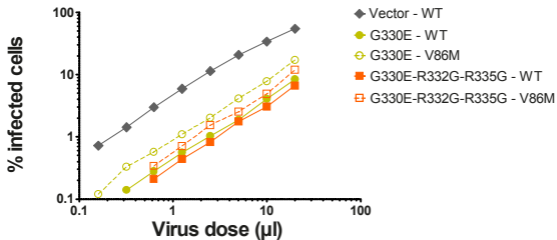**B**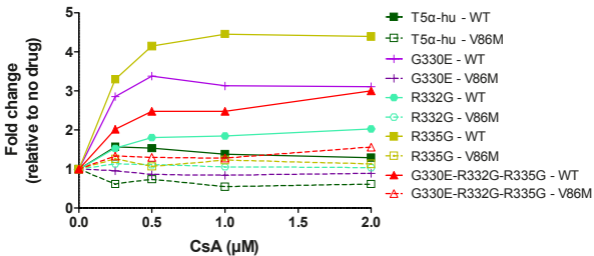

Supplement: 1742-4690-10-25-S1.pdf [file 1742-4690-10-25-S1.pdf]
